# Supplementary material for: Decoration of Pd and Pt nanoparticles on a carbon nitride (C3N4) surface for nitro-compounds reduction and hydrogen evolution reaction
Source: Royal Society of Chemistry journal article supplement (doi:10.1039/c7nj01221g), 2017-01-01
Supplement: c7nj01221g1.pdf [file c7nj01221g1.pdf]

## Supporting Information

### Decoration of Pd and Pt Nanoparticles on Carbon Nitride ( $C_3N_4$ ) Surface for Nitro Compounds Reduction and Hydrogen Evolution Reaction

Roshan Nazir,<sup>a</sup> Pragati Fageria,<sup>a</sup> Mrinmoyee Basu,<sup>a</sup> Subhashis Gangopadhyay,<sup>b</sup> and Surojit Pande<sup>\*a</sup>

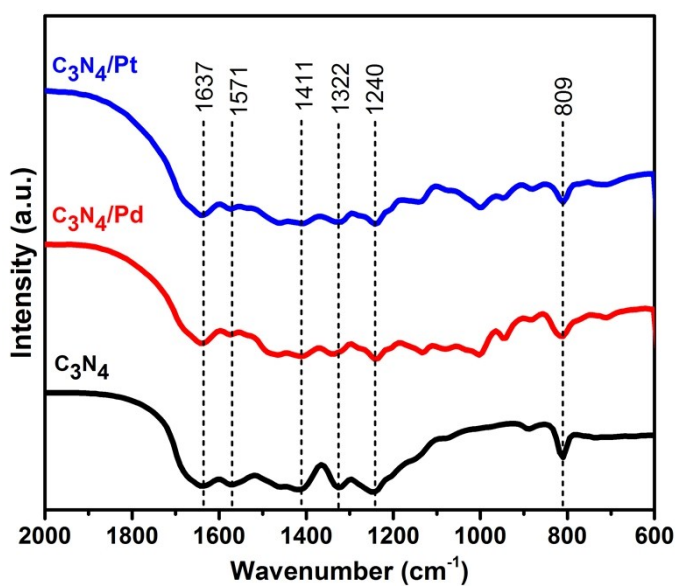

**Figure S1:** FTIR spectra of Pd and Pt loaded  $C_3N_4$  surface

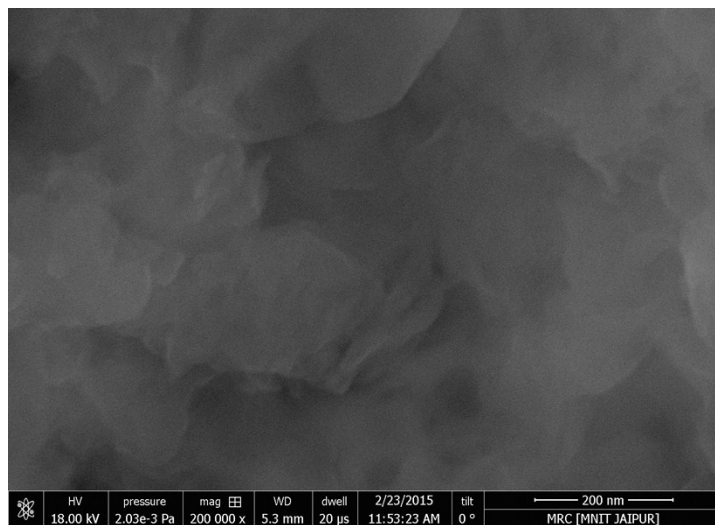

**Figure S2:** FESEM image of exfoliated  $C_3N_4$  sheet after 5 h sonication

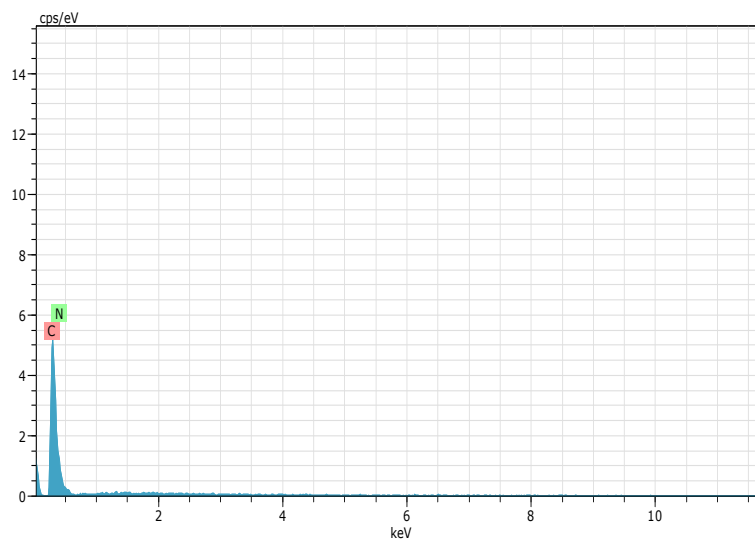

**Figure S3:** EDS analysis of  $C_3N_4$

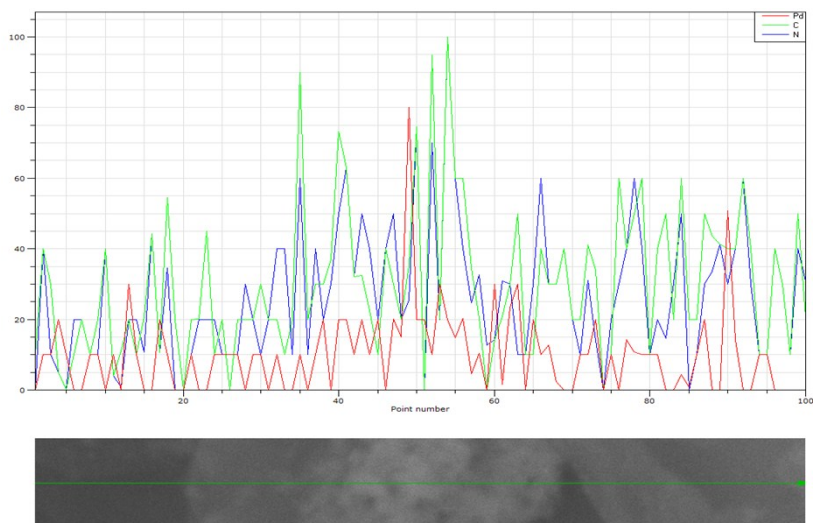

**Figure S4:** Line mapping of  $C_3N_4/Pd$  with FESEM image

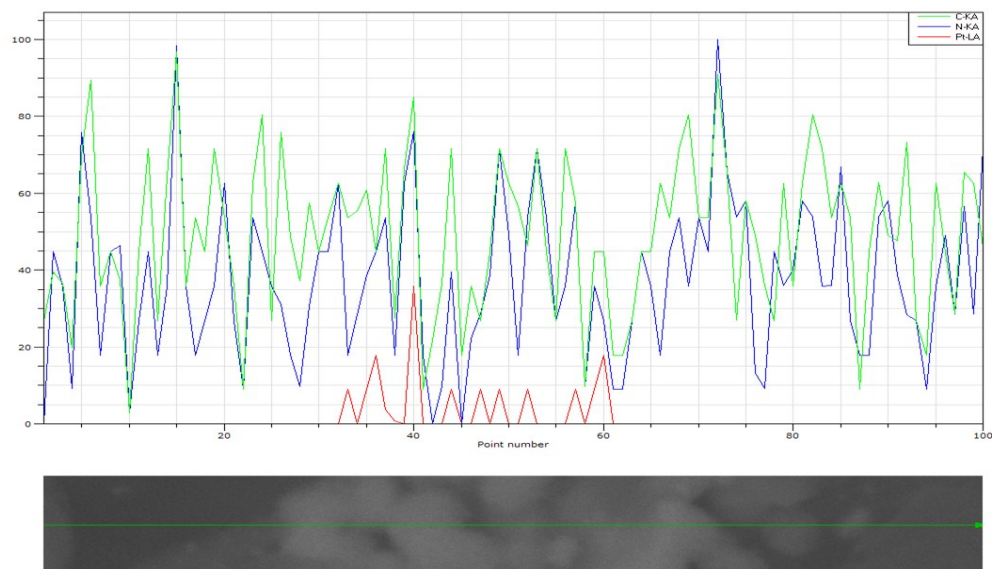

**Figure S5:** Line mapping of C<sub>3</sub>N<sub>4</sub>/Pt with FESEM image

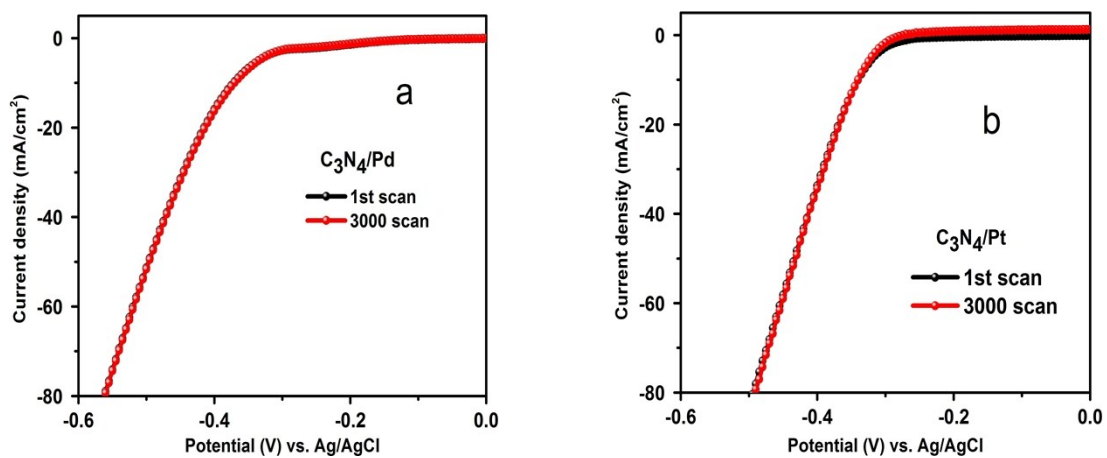

**Figure S6:** Comparative polarization curve of (a) C<sub>3</sub>N<sub>4</sub>/Pd and (b) C<sub>3</sub>N<sub>4</sub>/Pt initial run and after 3000 cycle.

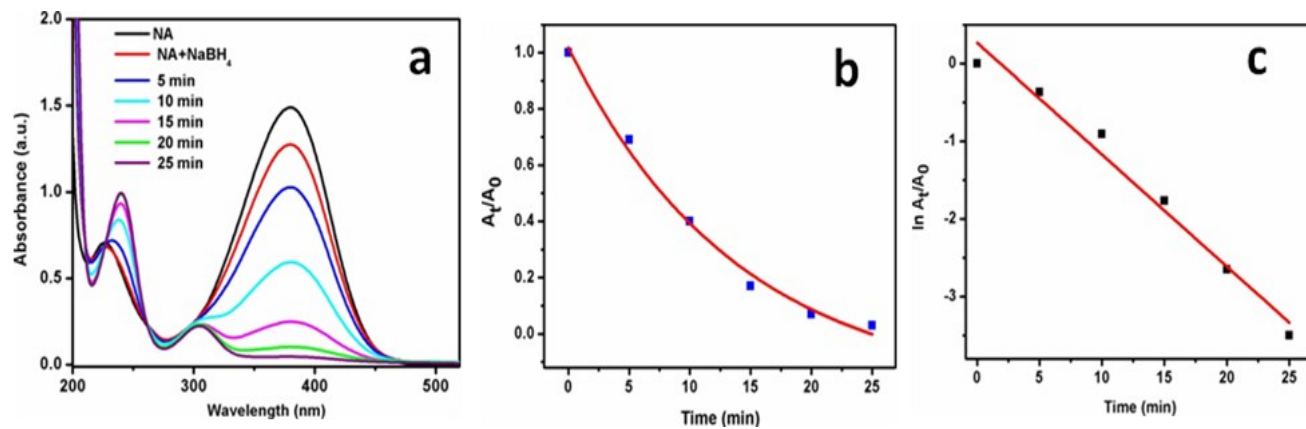

**Figure S7.** UV-vis spectra of (a) Reduction of 4-nitroaniline (4-NA) in presence of  $C_3N_4/Pt$  (b)  $A_t/A_0$  vs. time (min) plot (c)  $\ln(A_t/A_0)$  vs. time (min) plot. Conditions:  $[NA] = 10^{-4}$  M and amount of catalyst = 1.0 mg.

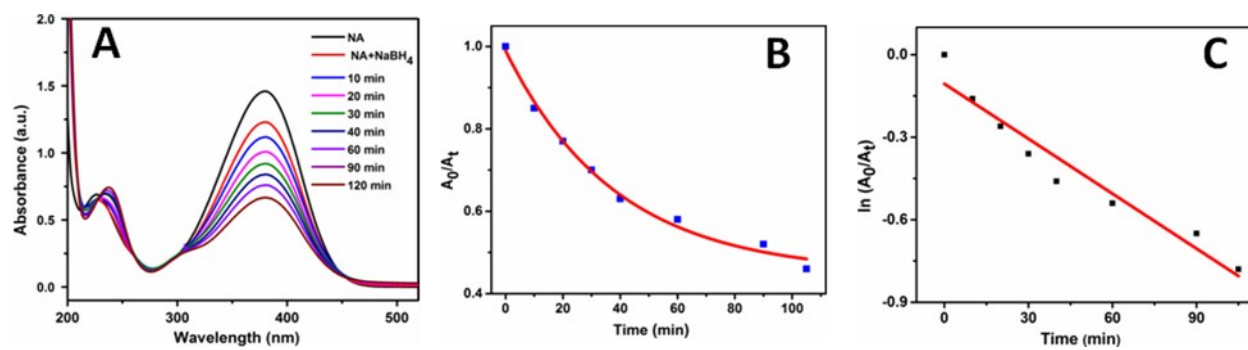

**Figure S8.** UV-vis spectra of 4-nitroaniline (4-NA) reduction in presence of  $C_3N_4$  (a) conversion of NA (b)  $A_t/A_0$  vs. time (min) plot, and (c)  $\ln(A_t/A_0)$  vs. time (min) plot

Conditions:  $[NA] = 10^{-4}$  M and amount of catalyst = 1.0 mg



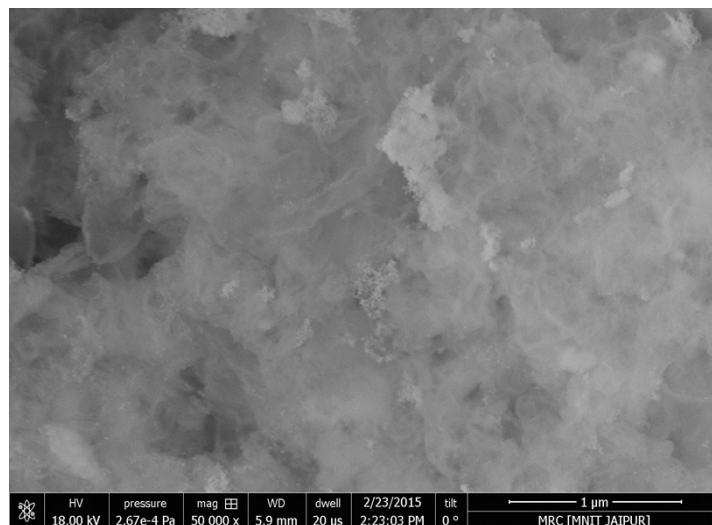

**Figure S9:** FESEM of reused  $C_3N_4/Pd$  after 4<sup>th</sup> cycle

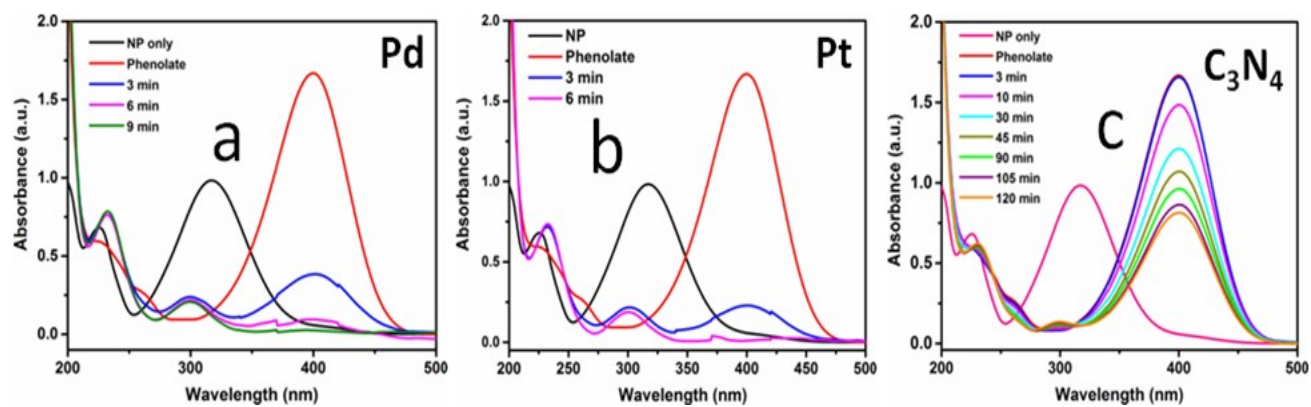

**Figure S10.** Reduction of 4-nitrophenol using (a)  $C_3N_4/Pd$  (b)  $C_3N_4/Pt$  (c)  $C_3N_4$  catalyst

Conditions:  $[NP] = 10^{-4}$  M and amount of catalyst = 1.0 mg

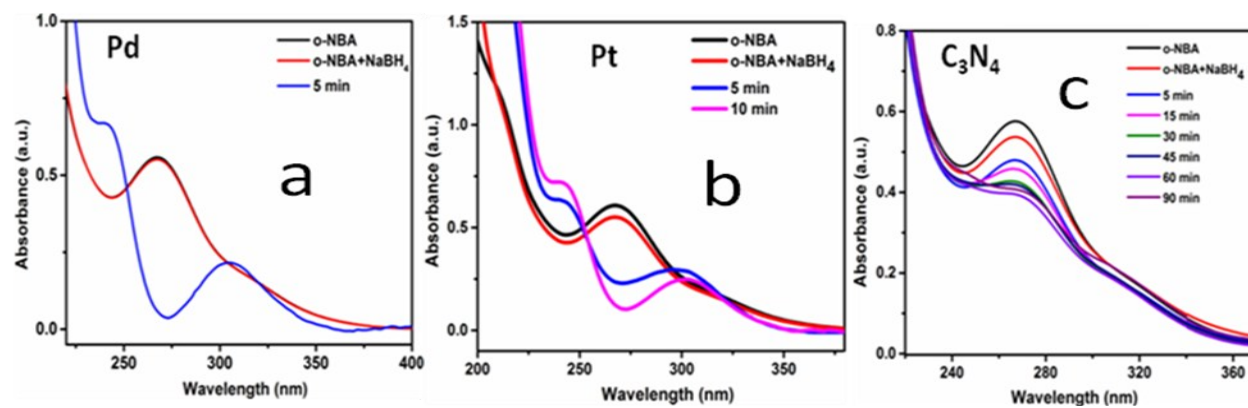

**Figure S11.** Reduction of ortho-nitrobenzoic acid (a) C<sub>3</sub>N<sub>4</sub>/Pd (b) C<sub>3</sub>N<sub>4</sub>/Pt (c) C<sub>3</sub>N<sub>4</sub>

Conditions: [NBA] = 10<sup>-4</sup> M and amount of catalyst = 1.0 mg
